# Supplementary material for: Physical activity behaviour change in people living with and beyond cancer following an exercise intervention: a systematic review
Source: PubMed Central journal article supplement (PMC10209249; doi:10.1007/s11764-023-01377-2), 2023-04-19
Supplement: 11764_2023_1377_MOESM1_ESM.pdf [file 11764_2023_1377_MOESM1_ESM.pdf]

## Supplementary File 1: Search strategy

Example search: CINAHL

| Search ID# | Search terms                                                                                           | Results |
|------------|--------------------------------------------------------------------------------------------------------|---------|
| S1         | MH Neoplasms                                                                                           | 85181   |
| S2         | Neoplasm* OR cancer OR carcinoma                                                                       | 673,741 |
| S3         | S1 OR S2                                                                                               | 673741  |
| S4         | MH Exercise                                                                                            | 55543   |
| S5         | Exercis* OR "Physical activity" OR "Weight training" OR Resistance OR Strength OR Endurance OR Aerobic | 439479  |
| S6         | S4 OR S5                                                                                               | 439479  |
| S7         | Program* OR intervention*                                                                              | 946425  |
| S8         | S3 AND S6 AND S7                                                                                       | 1039    |
| S9         | MH Muscle strengthening                                                                                | 12885   |
| S10        | MH Physical Activity                                                                                   | 44567   |
| S11        | MH Resistance Training                                                                                 | 6060    |
| S12        | S4 OR S5 OR S9 OR S10 OR S11                                                                           | 441491  |
| S13        | S3 AND S7 AND S12                                                                                      | 1042    |
